# Supplementary material for: Development of AMBER Parameters for Molecular Simulations of Selected Boron-Based Covalent Ligands
Source: MDPI journal article supplement (doi:10.3390/molecules28062866), 2023-03-22
Supplement: s1 [file s1]

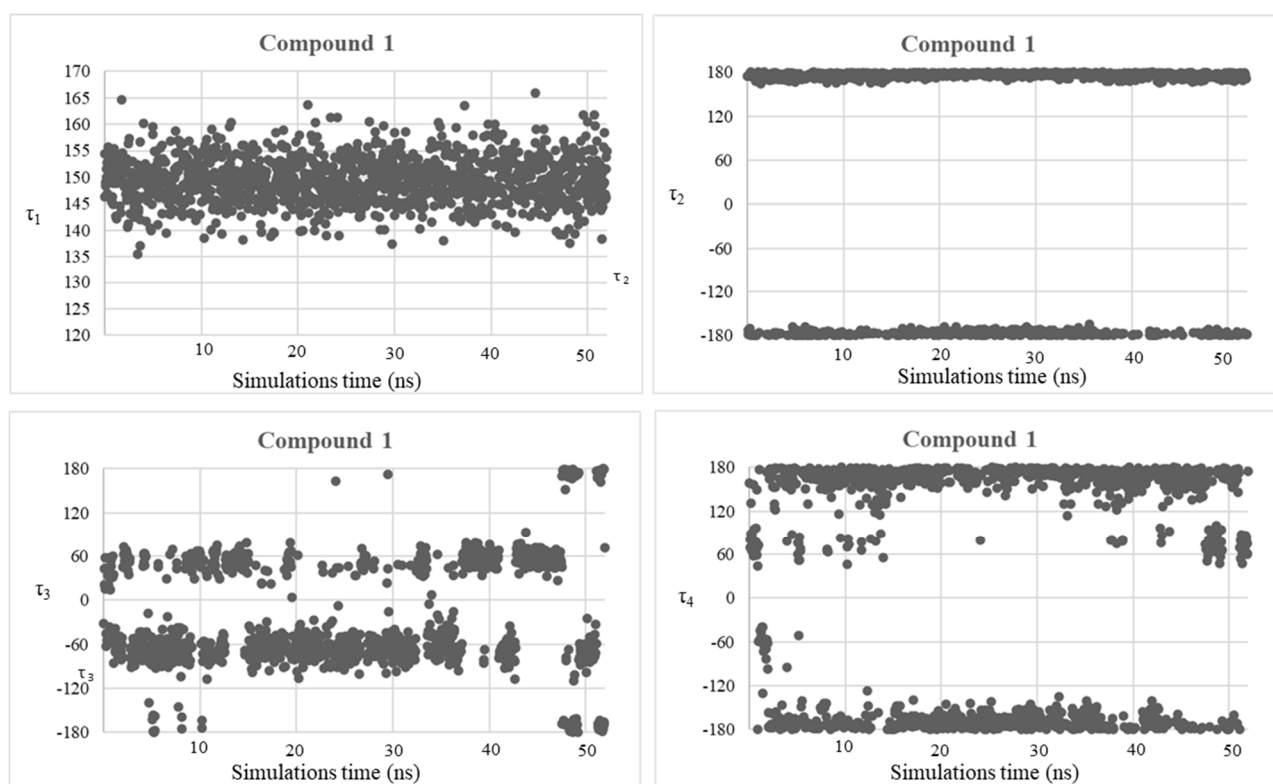

**Figure S1.** History of  $\tau_1$ ,  $\tau_2$ ,  $\tau_3$ , and  $\tau_4$  in **1** over the MD simulations starting from the docking pose.

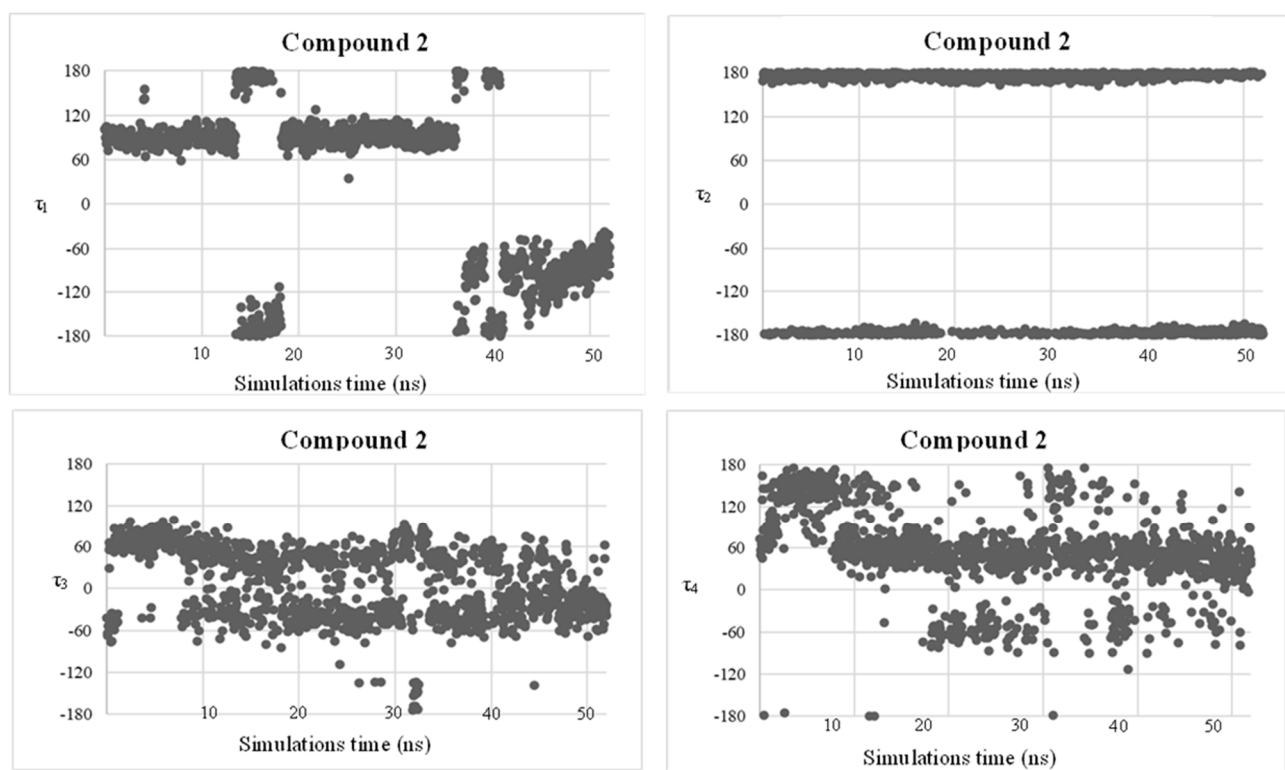

**Figure S2.** History of  $\tau_1$ ,  $\tau_2$ ,  $\tau_3$ , and  $\tau_4$  in **2** in the MD simulation starting from the docking pose.

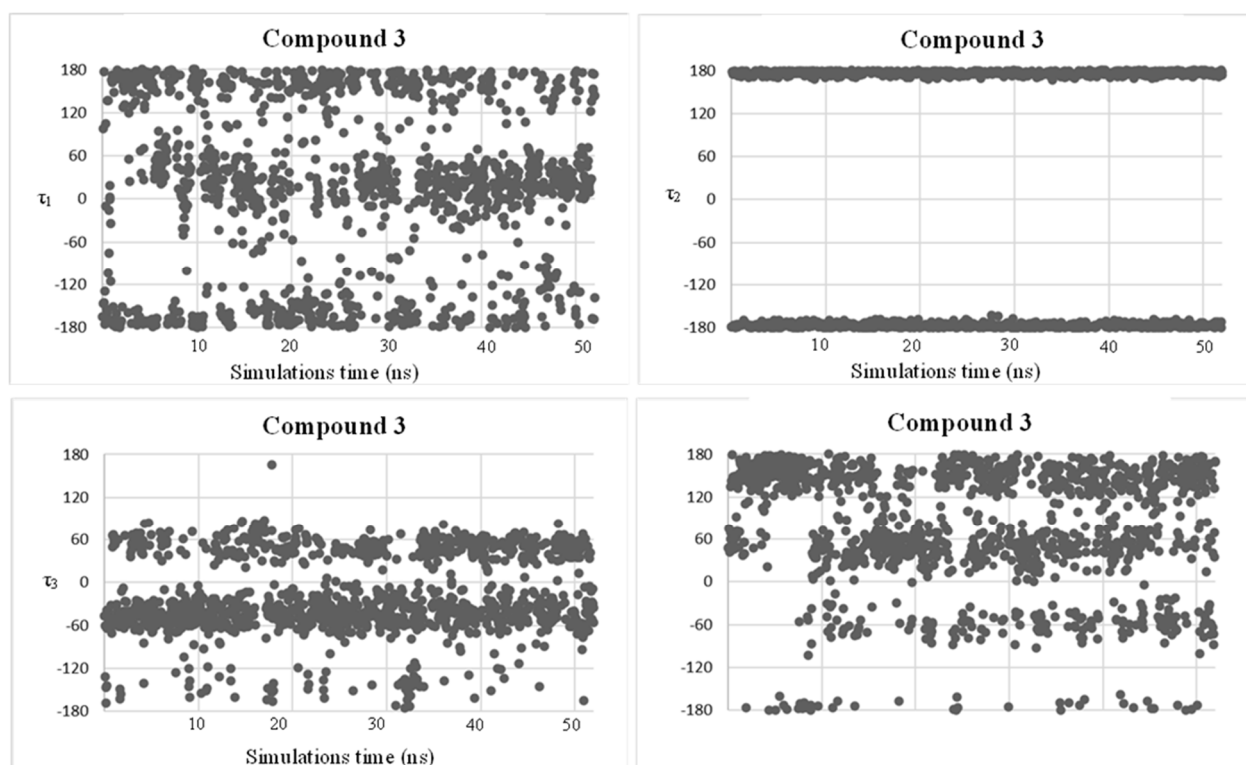

**Figure S3.** History of  $\tau_1$ ,  $\tau_2$ ,  $\tau_3$ , and  $\tau_4$  in **3** over the MD simulations starting from the docking pose.

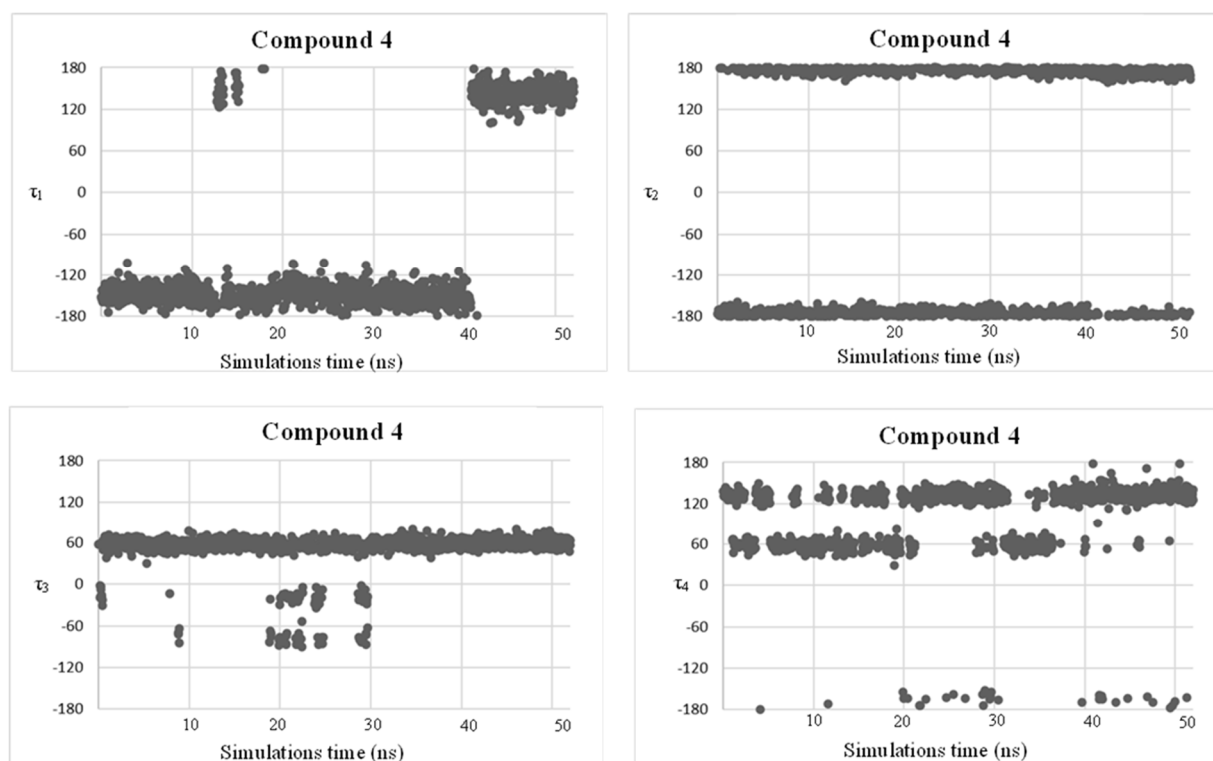

**Figure S4.** History of  $\tau_1$ ,  $\tau_2$ ,  $\tau_3$ , and  $\tau_4$  in **4** over the MD simulations starting from the docking pose.
